# Supplementary material
Source: publisher figshare collection journal article supplement (https://gsapubs.figshare.com/ndownloader/files/25302146)
Supplement: Supplementary file 1 [file 25302146]

## Sheet: Diatom counts
Table S3. Total diatom valves counted in (compacted) vibracore S
Depth (cm) from surface --->	25	26	27	28	29	30	31	32	33	34	35	36	37	38	39	40	41	42	43	44	45	46	47	48	49	50	51	52	55	57	58	59	60	61	62	63	64	65	66	66	67	68	69	70	72	74	75	77	78
Depth (cm) from top of uppermost core segment --->	0	1	2	3	4	5	6	7	8	9	10	11	12	13	14	15	16	17	18	19	20	21	22	23	24	25	26	28	32	34	35	36	37	38	39	40	41	42	43	44	45	46	47	48	49	50	51	52	53
Species or genera																											Contact A ------->															Contact B ------->
Achnanthaceae sp.-1
Achnanthes brevipes																	1			1	2						2	3			1		1															1
Actinoptychus senarius																				1	1			3											1	1		1						1		1	2	1
Amphora coffaeiformis
Amphora helenensis					1	1	1	1			1	1	1					1	1							1		2	1				1	1		1				2
Amphora holsatica	1																								1
Amphora montana
Amphora pseudoholsatica
Amphora pusilla																			1		1					3																		2
Amphora salina																																		2
Amphora sp.-1
Amphora ventricosa																												1										1
Aulacoseira ambigua															2
Aulacoseira crassipunctata
Aulacoseira distans							2			2								1										1
Aulacoseira granulata																																																1
Aulacoseira spp.
Bacillaria paxillifera			6	3	2			5	1				1				1			1		1		1	6	1						1									2	14		1
Bacillaria socialis	3			1											1			2					1																			1
Biremis ambigua									1		3		1		2	7	55	29	1	8	9	4	2	14	4	6	6	2							1				6	1		1	2
Caloneis aemula			1						2								1	1	1								1							1
Caloneis amphisbaena var. subsalina											2	1								2
Caloneis bacillum	2				7	3	8	5	29		5		20	29	63	56	46	7	1	40	43	13	13	56	43	71	31	34	2	8			1				1	2	4	7	4	3	7	1		9	24	6	20
Caloneis oregonica																				1
Caloneis westii	1								2						3		4			3	10			2	3	4				2			1	4	1		1					1				2	1	6	3
Catenula adhaerens		2	2	2		1												2			3		2	1				2		3						2	3	4	1				3
Chaetoceros resting spores					1						1						1
Chamaepinnularia krookiformis																											3			2	11	4		1	2	2		17							2
Cocconeis placentula	3					2				8		1					2		1	6	1	1	4	3	2	10			25					1			1
Cocconeis placentula var. euglypta	4					1				1	1	1		1					1
Cocconeis pseudomarginata
Cocconeis scutellum								1								1												1		3													1		2	1
Cocconeis sp.
Coscinodiscus sp.																																																1
Cosmioneis delawarensis
Cosmioneis grossepunctata																															2			1						1
Cosmioneis pusilla	59	36	43	16	36	25	27	10	41	29	17		24	29	3	6					7	17	6	5		1	21	4	1	26	33	11	31	13	31	20	34	7	19	25	24	20	9		3	53	48	80	2
Ctenophora pulchella		1												2													2	1		3																		2
Cyclotella atomus										8
Cyclotella meneghiniana										3	1																	1															1
Cyclotella striata		2			1	2	6	8	2	13	8	7	5	4	4	4		3	4			1	1	1			1						1	1		1			1	1		1			1
Cymbella aspera
Cymbella tumida																																							1
Cymbella turgidula		1	1	2							1	2				1					2																		2
Cymbopleura cuspidata
Cymbopleura naviculiformis
Denticula subtilis	1	10	6	17	8	4		26	1					3	1	5	1		3	8	7	34	15													2			3
Diadesmis contenta									1									6					1						1			1		1		1
Diatoma mesodon				1						1	1									1			1	1	1											1						1
Diatoma sp.																																				2
Diploneis didyma																																			1
Diploneis elliptica	6	1								2						1										1				2	2				1	1							1				2
Diploneis interrupta	1																										1												1				1			3	46		1
Diploneis ovalis																																															3
Diploneis smithii	3	1			3	2	9	3	7	3			2	1	1	1	1		2			1	5	3	1	9	3	1	1			18	1	3	1	1	1	2	4	4	2	2	3		1		1	1	3
Diploneis smithii var. recta					5	1			1					2	1					1		3	1	1			2						2							1			1	1
Diploneis smithii var. rhombica																							1			1
Discostella stelligera																																	1
Encyonema gracile																																																2
Encyonema mesianum	1		2	1						7	6	8		1			1	4	11	1	1		3	1	1	2					1					6		3		2
Encyonema minutum			2	1			1	3		6	1	5	3	3	1	5	1	3	5	6			1		1				3							1		2		1
Encyonema silesiacum	1		2							1								1	3					1			1									2				1			1
Epithemia adnata							1																																							1
Epithemia sorex								1										1		1								1		2									1
Epithemia spp.															1																																	1
Epithemia turgida										2	1			1	1					1				1		4						1			2
Eunotia bidens										1
Eunotia minor
Eunotia praerupta			1		1					1			1																						1	1
Eunotia spp.											1
Eunotia veneris											1
Fallacia forcipata											1												1		3		1				2				1	1	19	5								1
Fallacia ny		1		1								1			2	2	1	1	2	1	2	2	3		6	2	4	3	2	6	14	7	8	16	13	3	11	10					3	1
Fallacia pygmaea					4			4	2								1			2	1				6				1	3							1	1				1	1			2	2		23
Fallacia tenera												2	1				6	1			3	1	6	6	7	9	2	1	2			17	9	18	4	14	7	24	6			1	2		1	4	2
Fragilaria capucina	1																		5				1												1
Fragilaria rumpens			1	1
Fragilaria vaucheriae				1				1		3	2	5	2		2			1	17		3					2						2						1					2
Fragilariaceae sp.-1																									2											3							8		3	5	5
Fragilariaceae sp.-10																																													2
Fragilariaceae sp.-11																																				2
Fragilariaceae sp.-12						3	1	2				2	1	2	2		1	2			4		2		3		4			2	3	6			3	6		10	2	8	3	3	6	11	5				8
Fragilariaceae sp.-2		2
Fragilariaceae sp.-3																			3	1
Fragilariaceae sp.-4	3			8					2	2	1			1	5			3	8		3		2	5		7	6	1	1	5	10	20	23	11	15		27	9	78	24	6	38	56	54	50	26	4	3
Fragilariaceae sp.-5																							6
Fragilariaceae sp.-6																																										6		9
Fragilariaceae sp.-7																																	20	3						2
Fragilariaceae sp.-8																																													2
Fragilariaceae sp.-9
Fragilariaceae spp. (girdle view)																		4							6		6					6			9					3
Frustulia rhomboides					1			1											1
Frustulia vulgaris		3	4					1	3		3									3							3	1		2	1			5			1			1	6
Gomphoneis mammilla										3				3
Gomphoneis sp.	1																1			1	2		1							1				1					1
Gomphonema affine	1									2			1						1	1			1	1	1		1	1				1											1
Gomphonema augur	1		2							1	2
Gomphonema clevei
Gomphonema gracile											2	1			1			1			1			2	4												1	1		1							1	4
Gomphonema parvulum	1	2	3				2			7	9	1	4		1	6	3	5	1	4		6	4	9	2		1	3	1					1		3		1	2	1		3			2
Gomphonema sphaerophorum											1
Gomphonema spp.
Gomphonema truncatum
Grammatophora oceanica																						1
Gyrosigma eximium	1				1				1																	1								2								1	1		1	1
Gyrosigma sp.-1
Hannaea arcus			1					2		6	10	29		1	1	4	2	13	42	1	6		2	2		1											1						7
Hantzschia amphioxys							1											1														1
Hantzschia virgata																																	1
Hyalodiscus sp.
Luticola mutica	58	58	36	85	44	94	79	102	40	51	28	14	67	63	53	30	33	9	4	17	25	33	59	53	30	2	59	40		31	43	53	27	18	27	31	33	50	30	23	24	29	11	43	45	53	14	25	26
Luticola sp.-1																	3			5	2						3	3	2	5									1								3
Martyana martyi														1					1		2		1	1		1		1	5				1	1		2	3	3	1	5			3		1
Mastogloia exigua													1																														1
Mastogloia smithii																																1							1							2	3	1
Melosira dubia																			2																										1	2
Melosira moniliformis
Melosira nummuloides																																			1		1												2
Melosira varians																		1
Meridion circulare						1				2				1	1	1								1	1	1			1														2
Navicula arenaria																																													6
Navicula cancellata																					1
Navicula cincta	28	25	26	23	29	17		6	4	5	8	1	9	3	1	6	3	1	1		3	6	8	1	4		1	2	2	16	21	29	14	6	22	6	31	17	11	13	11	16	13	25	15	4	2	21	7
Navicula cryptotenella	4			2													1		1	1	2						1		2				1	5	1	2	2	1	14		10	6	2	12	3	1	15	8	15
Navicula digitoradiata																		1								1															1					4
Navicula directa																											1
Navicula eidrigiana											16		8		9	14	2	13		4	7	2	6																1
Navicula gregaria	2		2	1		1						5			2				15	7		1	6	1	2	7	3	7		2	11	4			3	13	18	18	3				7	1	1
Navicula hanseatica					1																1			3	3	3	3				1				1	5	3	1		2		1		1
Navicula inflexa		4				1	1	1	1				2		1	2	2		1	1							3			1	4			7		1		1	4			4	5		2	1
Navicula kefvingensis									1				2	1	1	1	2				2			1	1
Navicula lanceolata										1							1																		1		1				2	3
Navicula lapidosa																	1		1		1														1
Navicula libonensis	1		1						2									8		3	1	1								1					2		1	2					2				2
Navicula microdigitoradiata											1										1																							1
Navicula peregrina				1	2											1	3	17			2										1									1							4	1	2
Navicula peregrinopsis		2			2												2																									2
Navicula phyllepta
Navicula pseudolanceolata			2	1	12	7		1	11		5	3				15	1	8		11			8	6	10	8	9	1					1		7										1	1	1
Navicula rhynchocephala		1									4		1			1	4	17		13	7	6		9	7	3	1	1		3			1	4					3					1	1	2		2	2
Navicula rossiana																	1																												2	2
Navicula salinarum		1		2	1	2			1		1				3	6	7		3	1	5	1		3	7	16	3	11			1	1	1		1		3	6	1		4	1			5	2		2	8
Navicula salinicola																	2				1				3		8	20			2	3									1	1		13	5	2
Navicula slesvicensis															1		3	23			2																1		1
Navicula sp.-1											18	34	11	5	7	2		19	34	13		11	14	14	16	22	13			8						12	11					2	11
Navicula sp.-2		3										2	1
Navicula sp.-3																									3
Navicula sp.-4		3
Navicula sp.-5																																										3
Navicula sp.-6																9
Navicula tenelloides	3				2	1			2		1				1	7			4			1	3	2		2		14		1	2	12	1	1	1		2	9		1	4				3	1
Navicula vaneei																		3
Nitzschia bilobata	1		1		3				13	1	1				1	3	4		1	1	3	1		3		2						1								1		1	1		1	1	1	2	2
Nitzschia brevissima
Nitzschia frustulum																				1
Nitzschia laevis																																														1
Nitzschia obtusa							1															1	1			1							1					1
Nitzschia palustris								1																						4	4	1							1
Nitzschia pura					3	5		6	2		7	3	4		4	2	1		2	10			3	2			1	2		7	1	1			3	1	1	1		3	5	2			1	2		2
Nitzschia salinicola	1																																												3
Nitzschia scalpelliformis	1			1	1	1	1	1	3		5					2	2			1				1	4	6	1	2		10							2	1			3					2
Nitzschia sigma			7			1	3	1	8				8	10	10	15	10	6		20	36	5	1	4	3	2	3	2			2		2	5	5		1		2	8	5		4		4	2	3	8	16
Nitzschia sigmoidea								1					1								6			1				10										5			3
Nitzschia sp.-1										3
Nitzschia sp.-2							2			5
Nitzschia sp.-3
Nitzschia sp.-4														2														8									1							11		1
Nitzschia sp.-5
Nitzschia sp.-6																												2									12						11
Nitzschia sp.-7																														2	1				1
Nitzschia terrestris
Nitzschia tryblionella var. maxima																					2																									2	3
Nitzschia vexans						1																																						2		2
Odontella aurita							2																	1			1						1			1			1			3
Opephora sp.																	1	2
Paralia sulcata			6					1	1	1		1		7	2	1	1		1	1	3	2		2		5	17	7		31	14	18	29	44	26	3	10	8	3	8	2	2					3	2	3
Petroneis granulata																										3																1
Petroneis marina																												1						1	1						1					1	1	2	4
Pinnularia acrosphaeria
Pinnularia borealis																				1
Pinnularia brevicostata var. sumatrana
Pinnularia capitata
Pinnularia divergens											1				1	1																													1
Pinnularia gigas							1
Pinnularia hemiptera
Pinnularia interrupta
Pinnularia lagerstedtii	21	21	26	14	18	15	26	15	14	11	7		10	32	9	21	4	2		6	3	25	27	12	11	6	12	8		32	23	18	14	23	28	6	20	15	26	24	19	16	21	20	35	13	14	45	4
Pinnularia lata
Pinnularia microstauron			2	1	1
Pinnularia nodosa
Pinnularia notabilis
Pinnularia sp.-1	16	21	27	18	6	13	11
Pinnularia sp.-2																																			1
Pinnularia spp.																																				1
Pinnularia viridis
Pinnunavis elegans																		1							1		1	1
Placoneis sp.-1																										1	1
Planothidium delicatulum		1			1		1		1								18			2					6	1						4	4	6	1	1		8	1	19	13		2	2			2
Planothidium lanceolatum	3	4	4	14	5	2	13	1	1	22	24	51	7	7	15	3		7	52	3	13	11	8	7	2		12	5	40	11		3	1			51	1	2	13			11	20	5				1
Planothidium sp. cf. lanceolatum
Planothidium sp.-1
Pseudofrustulia lancea					1															6																	1							1
Pseudopodosira kosugii																															1							1
Pseudostaurosira brevistriata				1																	1	6													11						8
Rhaphoneis amphiceros								1	1											1	2	2									3	1		1	1		1						1
Rhaphoneis sp.-1										18																				2	2		1				6		3	14	13		17						2
Rhaphoneis sp.-2																	1		2
Rhaphoneis sp.-3																																									6		2	1	4	5
Rhaphoneis surirella + R. surirella var. australis						1	4	1	1	1	1	1	3	3	2	1		2		1		2		1		2	1	1	1	1	4	2	6	3	7	1	2	3	2	2	9	19	6	2		3	4	2	5
Rhoicosphenia abbreviata		6		1		2	10	2	2	6	18	24	6	7	3	2	5	4	12	11	2	6	2	7	8	13	16	3	23	9	2		5	5	1	24	3	3	4	4		3	3	2	2	5	3	1	3
Rhoicosphenia linearis	7	1		3	1			1		3	1		1	1					1		1	5				1	3			3	1		1				1		2	8	1					1
Rhoicosphenia marina																																														1
Rhopalodia brebissonii							1								1		1			3	13		2	1	8	1	1	4											4	1					1
Rhopalodia constricta																																										1
Rhopalodia gibba
Rhopalodia gibberula																																															1	1
Rhopalodia musculus																																						1	1			1					3	1
Rhopalodia pacifica
Rhopalodia rupestris
Rhopalodia spp.
Scolioneis tumida																																																	1
Sellaphora pupula									1										1										1			1
Stauroneis acuta				1							1					1
Stauroneis phoenicenteron																													1
Staurophora amphioxys
Staurophora salina																		1			5					1		1														1		1	1
Staurosira construens						1										1		1
Staurosira sp.																															23	13
Staurosirella sp.						2	2	1									2				18		9							2									8			6
Surirella amphioxys																																											3	1
Surirella fastuosa																																										1							1
Surirella linearis																													1
Surirella littoralis																1		1	1						3		2									1
Surirella marina																																														1	1		2
Synedra goulardii																																											1
Tabellaria fenestrata			1
Tabellaria floculosa																									1
Tabularia fasciculata	3	2					4	1		1	3	1	1		2	1			1	12		7			1	3	6	5		3	3	1	4		5	5	1	5	4	3		10	7	5	8	3		4
Thalassionema nitzschioides	3	2	4	1	3	1	3	2	3	3	2	1	5	10		2	3	1	6		3	7	3	2	6	2	1							1			3	2	1				2		3
Thalassiosira lacustris				1	1		1	1																															1
Thalassiosira spp.	4	1			6		17	4	1	3	5	1	1	4	4	3	2	4	10	3	5	3		2	2	13	6		9	28	15	7	5	8	4	19	3	4	13	1	7	2	1		9	6	2
Tryblionella acuminata																																														2
Tryblionella apiculata					1								4				1							1	2					7	2	1		1	2			1			1	6		3	4		12	9	23
Tryblionella coarctata																																	3							1				1	3		1
Tryblionella debilis	3	10	14	6	26	28	3	16	42	15	1	8	17	11	17	9	4	1		3	1	2	10	2			5	9			2		5	18	3	2		3	13	11	56	13	2	19	6	6	4		28
Tryblionella granulata								1																									3	1	4	1	1			2					2	1	3	4	1
Tryblionella lanceola																		2																					2		1			3	2	2
Tryblionella levidensis																	1				1	2		3	1					2	1	2			1	1		1		1	1		1		3	3	1
Tryblionella littoralis					1				2						2			1		2				5	4	6		2								1												5
Tryblionella navicularis																																				1					4		1		2
Tryblionella pararostrata	4	11	6	13	11		1	15	8	3			9	2	21	15	8				4	9	3	3	1		10	1			1	1	1	7	1				1	20	3	6	6	2
Tryblionella plana														1		8	1	3						2	6								2	1					1							1			1
Tryblionella salinarum													1		1			1		1	1		1		4														1	2	1	2					2	2	12
Tryblionella scalaris
Tryblionella sp.-1
Ulnaria sp.-1
Ulnaria ulna	3			1						8	4	3			2	3	2		1	1	1				1				1	1	1				1				1						1
Unknown	5	6	8	11	7	7	12	6	9	14	11	18	13	7	8	10	13	22	17	14	11	14	11	15	18	14	11	12	6	12	8	18	11	11	16	11	7	11	13	11	14	11	17	11	10	12	18	11	16
Total valves counted	266	245	250	257	260	249	258	263	271	289	256	238	260	261	283	299	286	275	290	276	312	257	272	291	283	285	321	250	136	305	280	292	247	264	279	280	296	285	325	275	280	283	303	270	272	265	267	271	246
[truncated: 86 more columns]
